# Supplementary material for: Water-soluble metal nanoparticles with PEG-tagged 15-membered azamacrocycles as stabilizers
Source: Royal Society of Chemistry journal article supplement (doi:10.1039/b907705g), 2009-01-01

## Supplementary Information

### Water-soluble metal nanoparticles with PEG-tagged-membered azamacrocycles as stabilizers

Nereida Mejías, Anna Serra-Muns, Roser Pleixats,\* Alexandr Shafir and Mar Tristany

*Department of Chemistry, Universitat Autònoma de Barcelona, Cerdanyola, 08193-Barcelona, Spain.*

**Table 1, entry 1.** Pd nanoparticles stabilized by compound 4

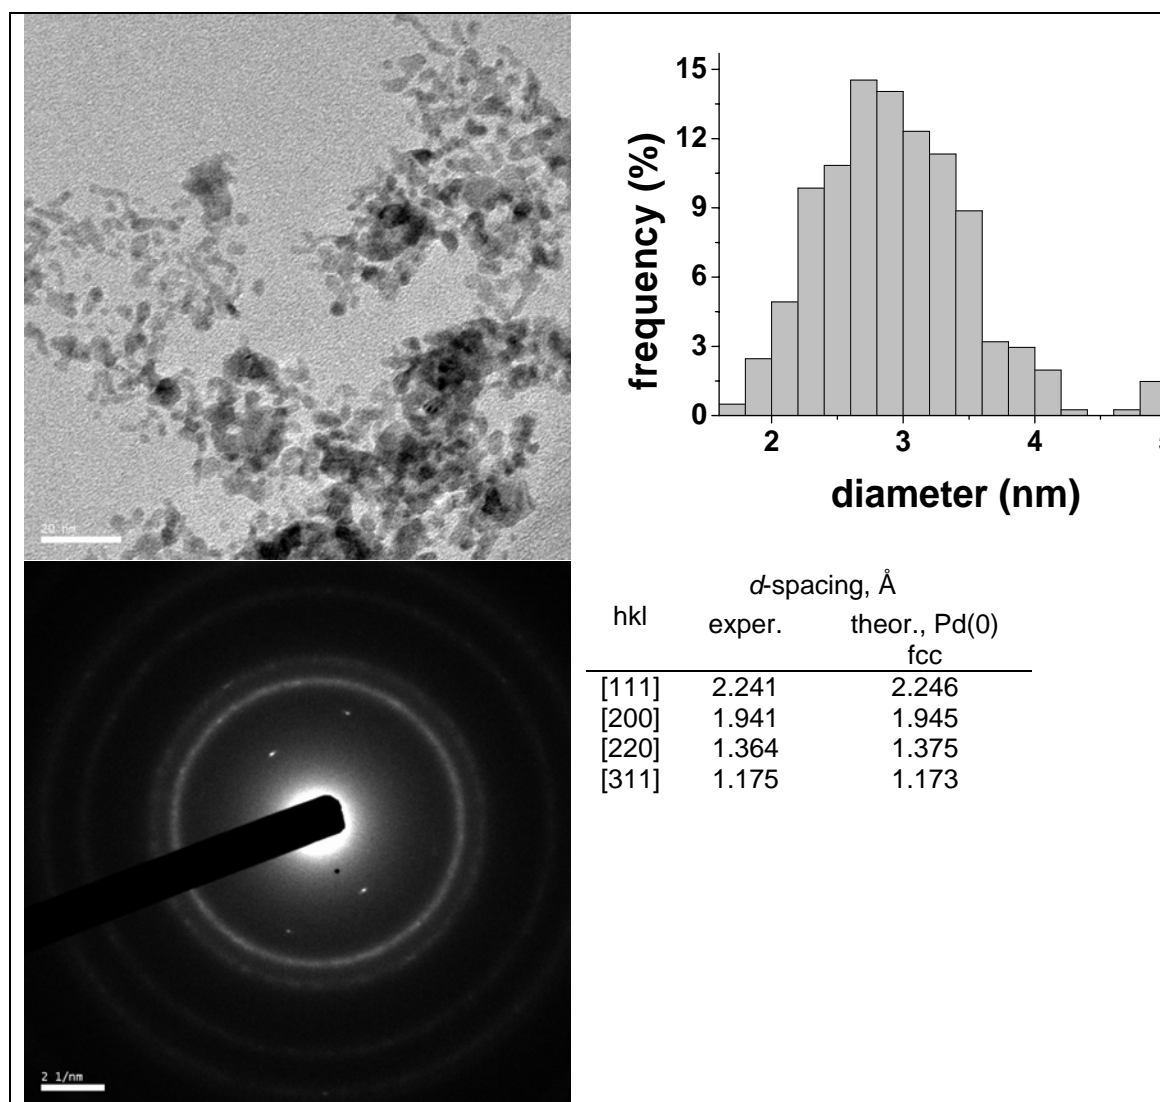

**Table 1, entry 3.** Pd nanoparticles stabilized by compound **4**

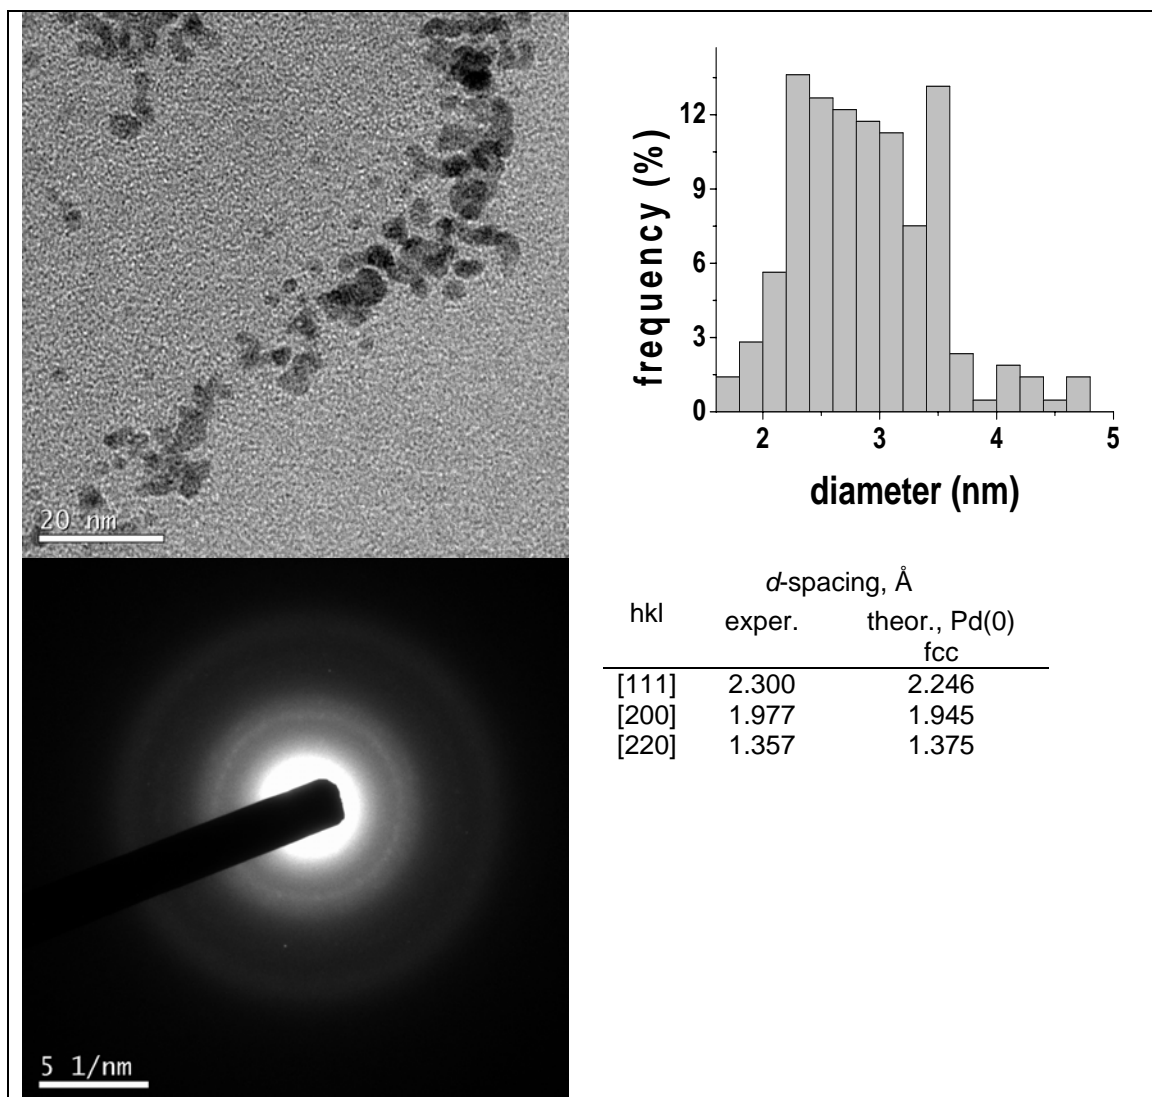

**Table 1, entry 4.** Pd nanoparticles stabilized by compound **3**

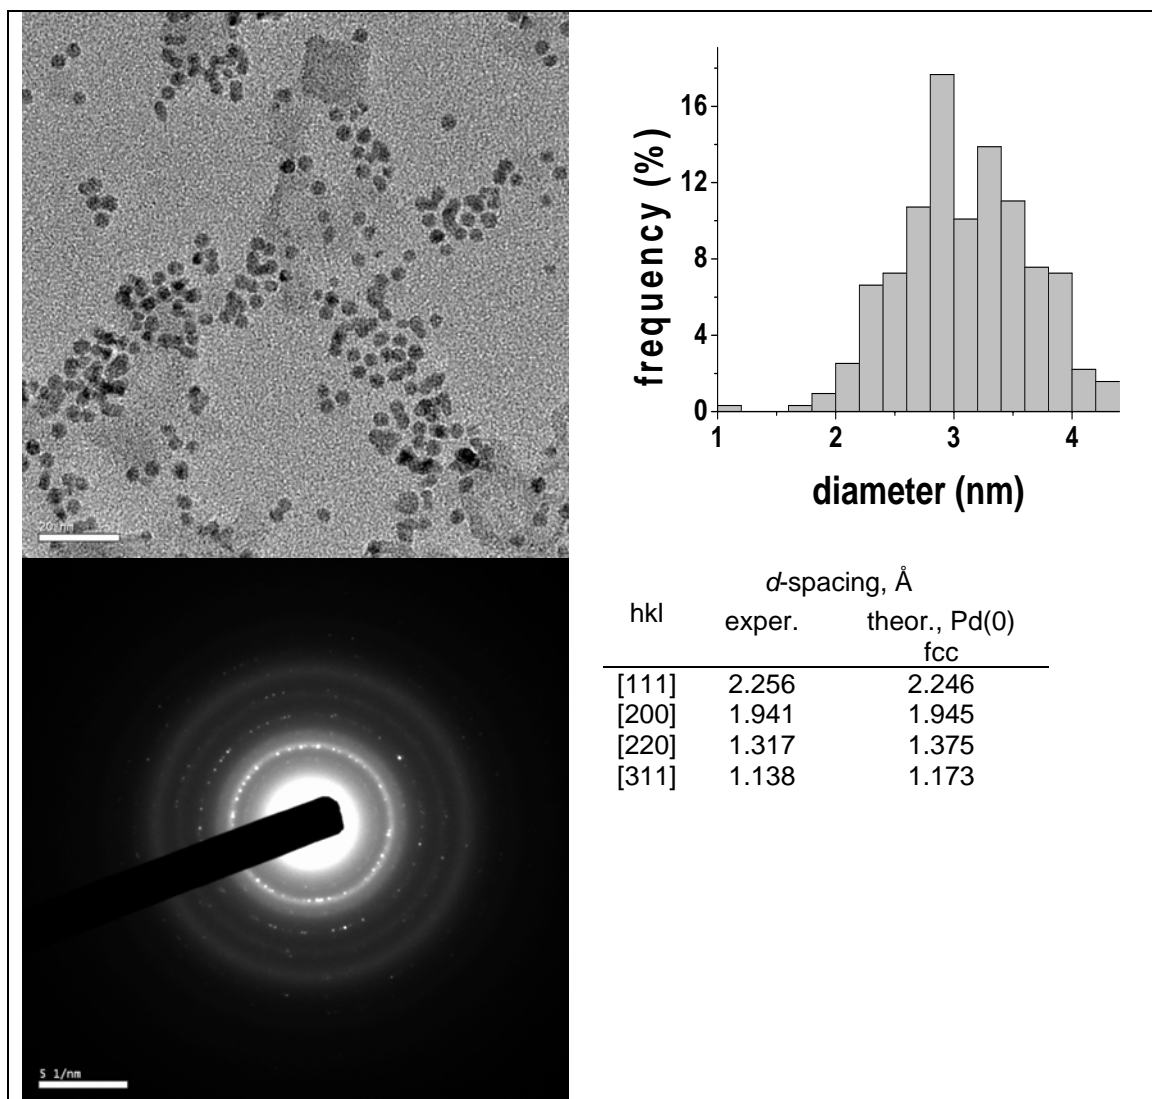

**Table 1, entry 6.** Pt nanoparticles stabilized by compound **4**

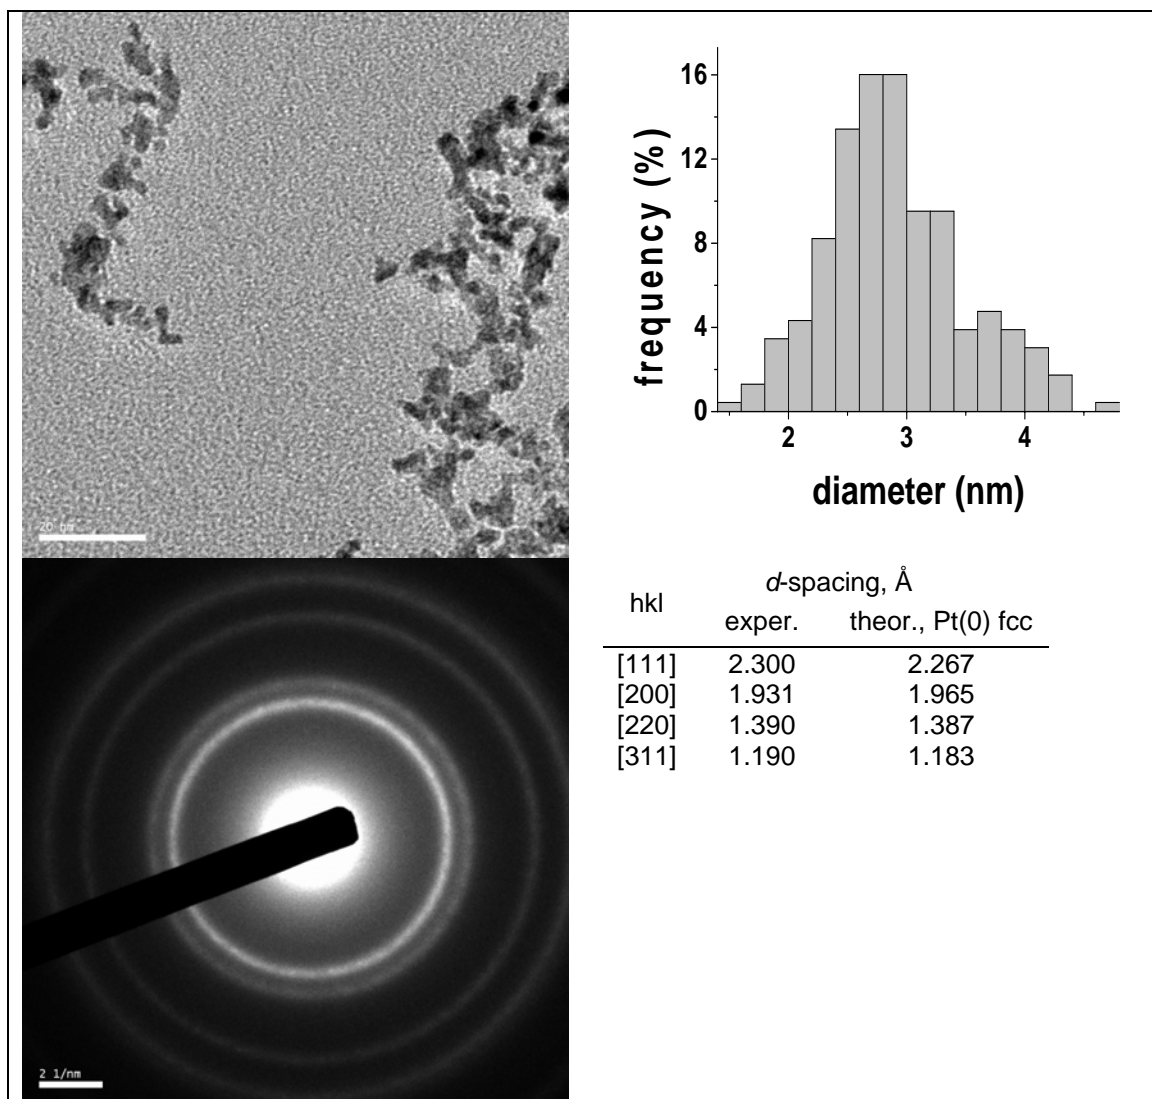

**Table 2, entry 2.** Au nanoparticles stabilized by compound **4**

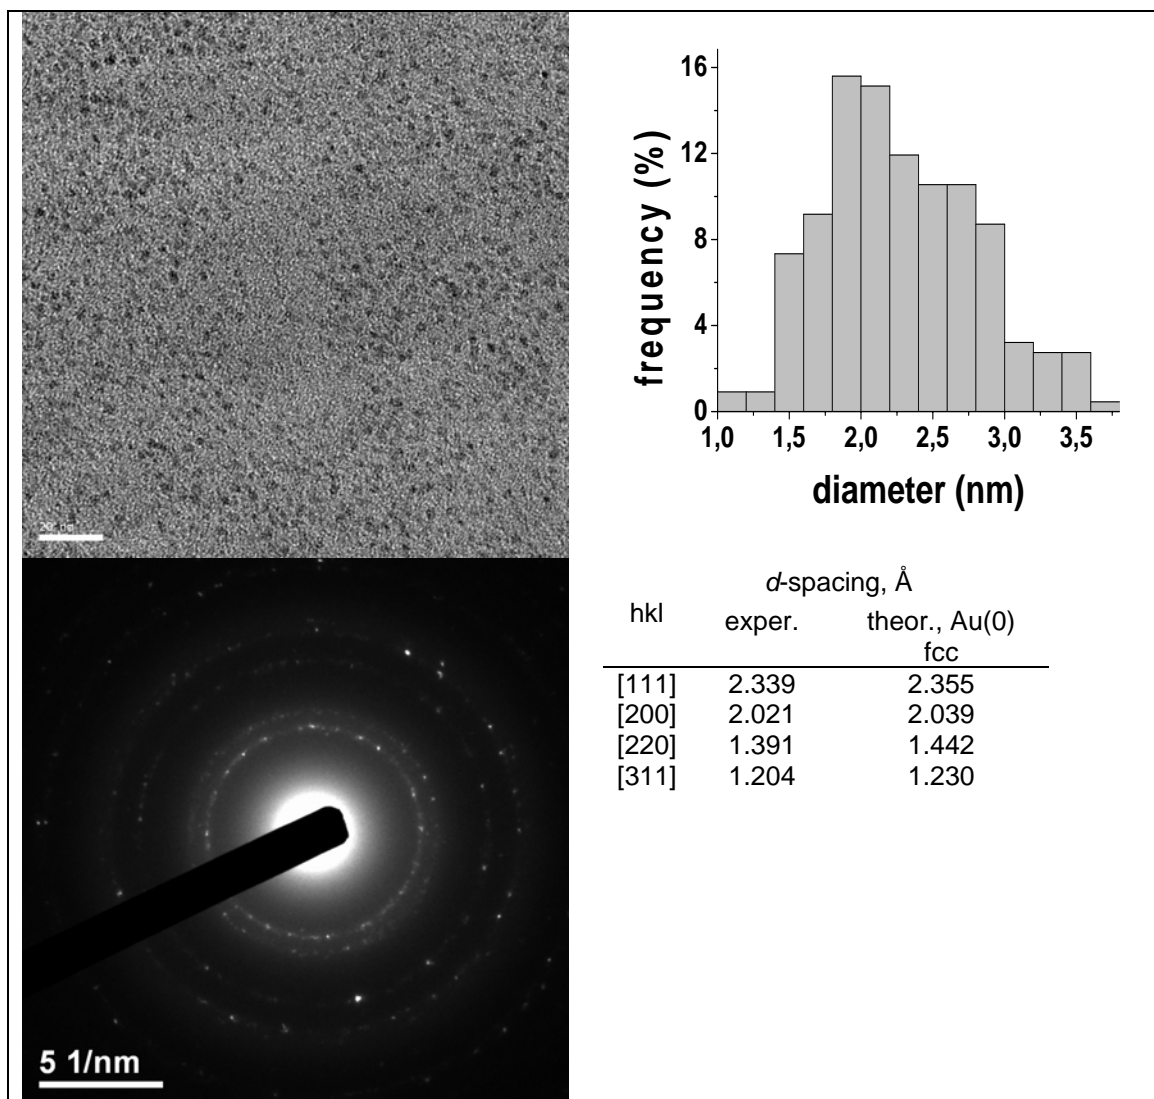

**Table 2, entry 3.** Au nanoparticles stabilized by compound **6**

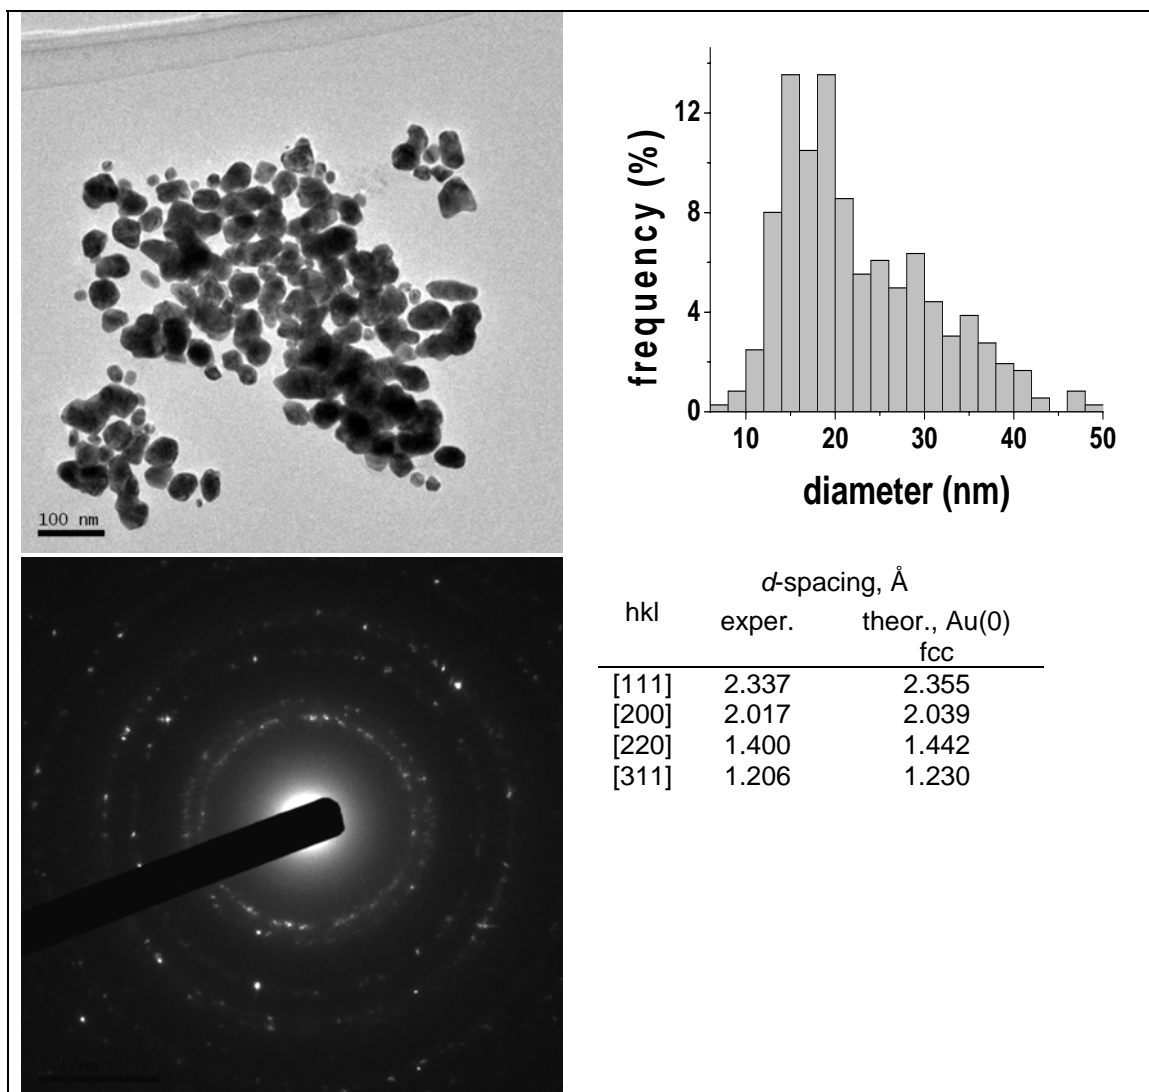

**Table 2, entry 4.** Au nanoparticles stabilized by compound 3

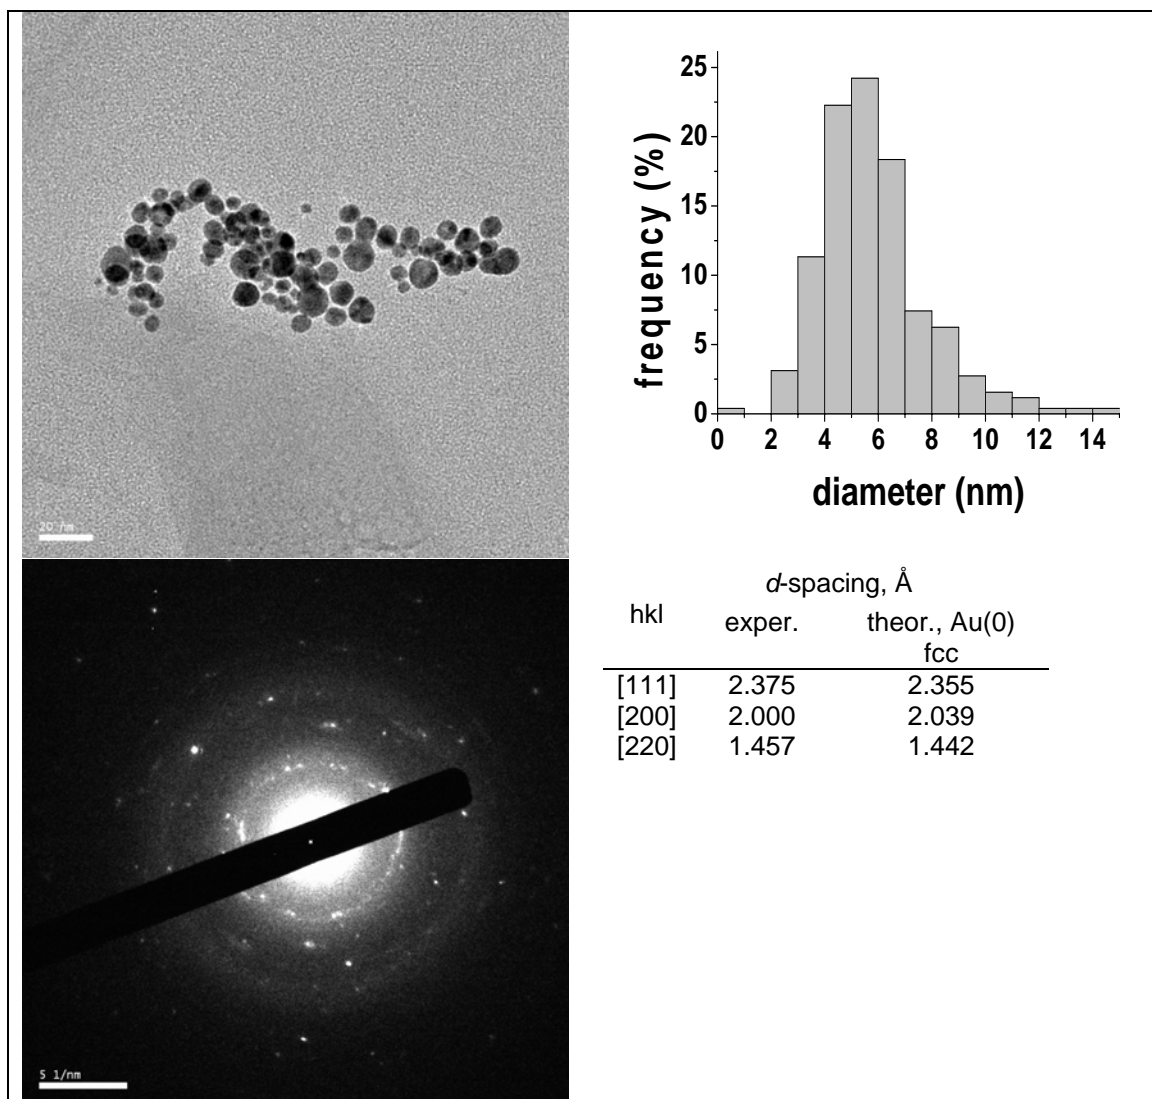

**Table 3, entry 1.** Rh nanoparticles stabilized by compound **3**

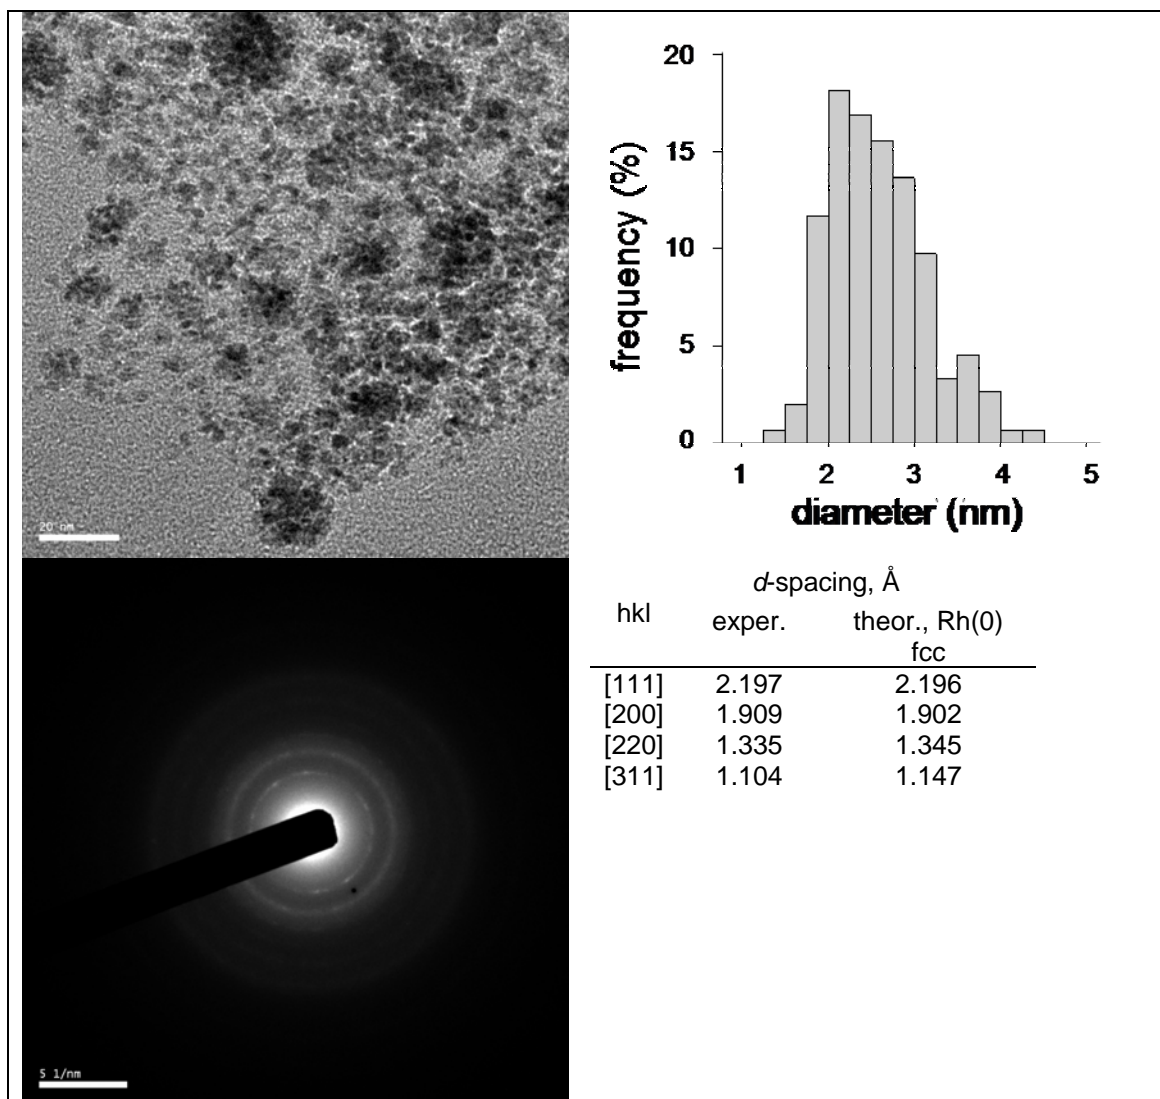



**Table 3, entry 2.** Rh nanoparticles stabilized by compound **3**

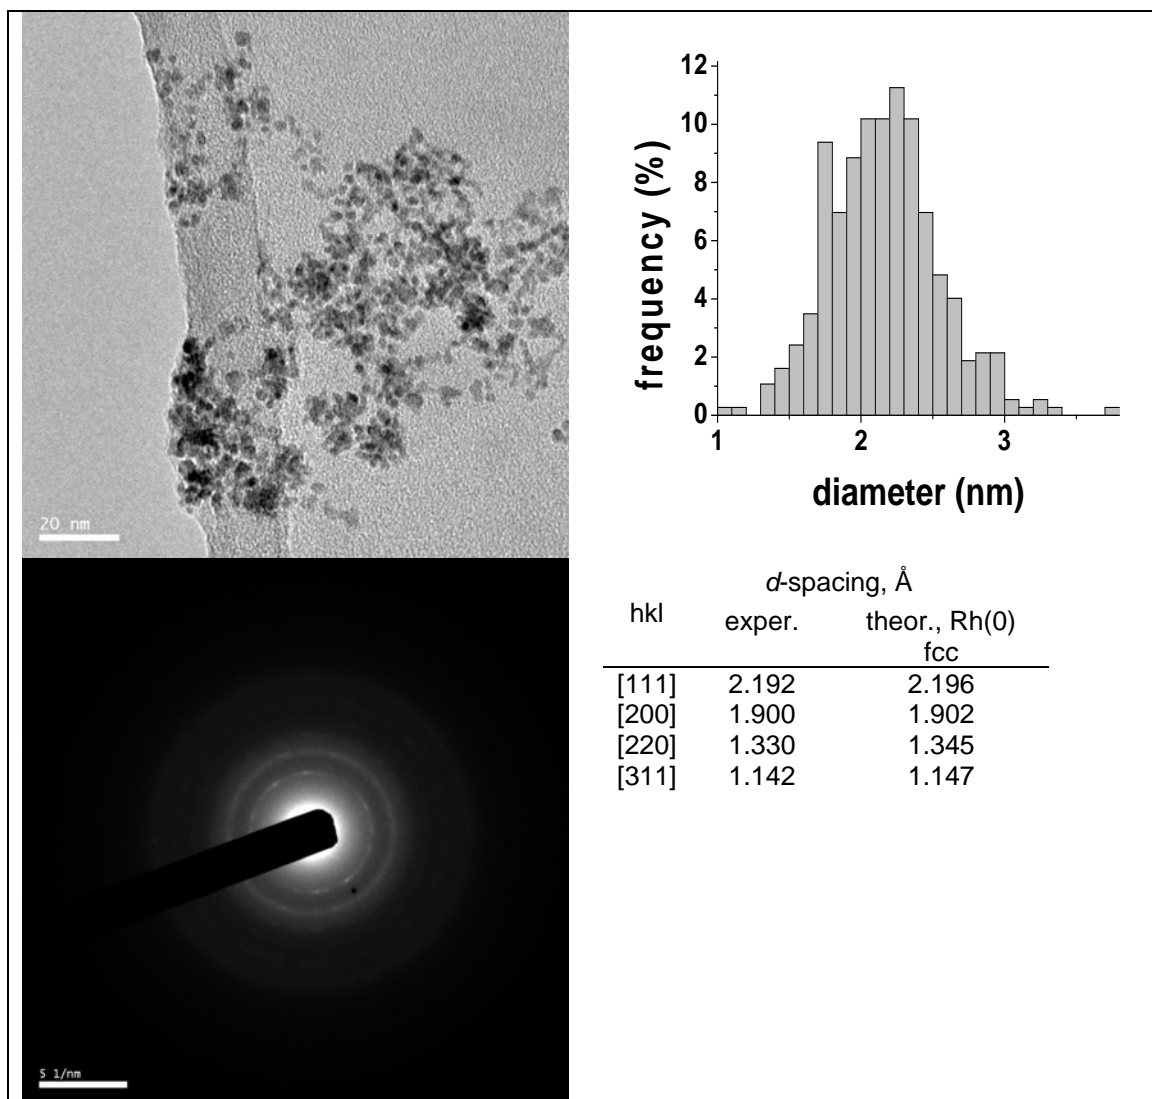

**Table 3, entry 3.** Rh nanoparticles stabilized by compound **4**

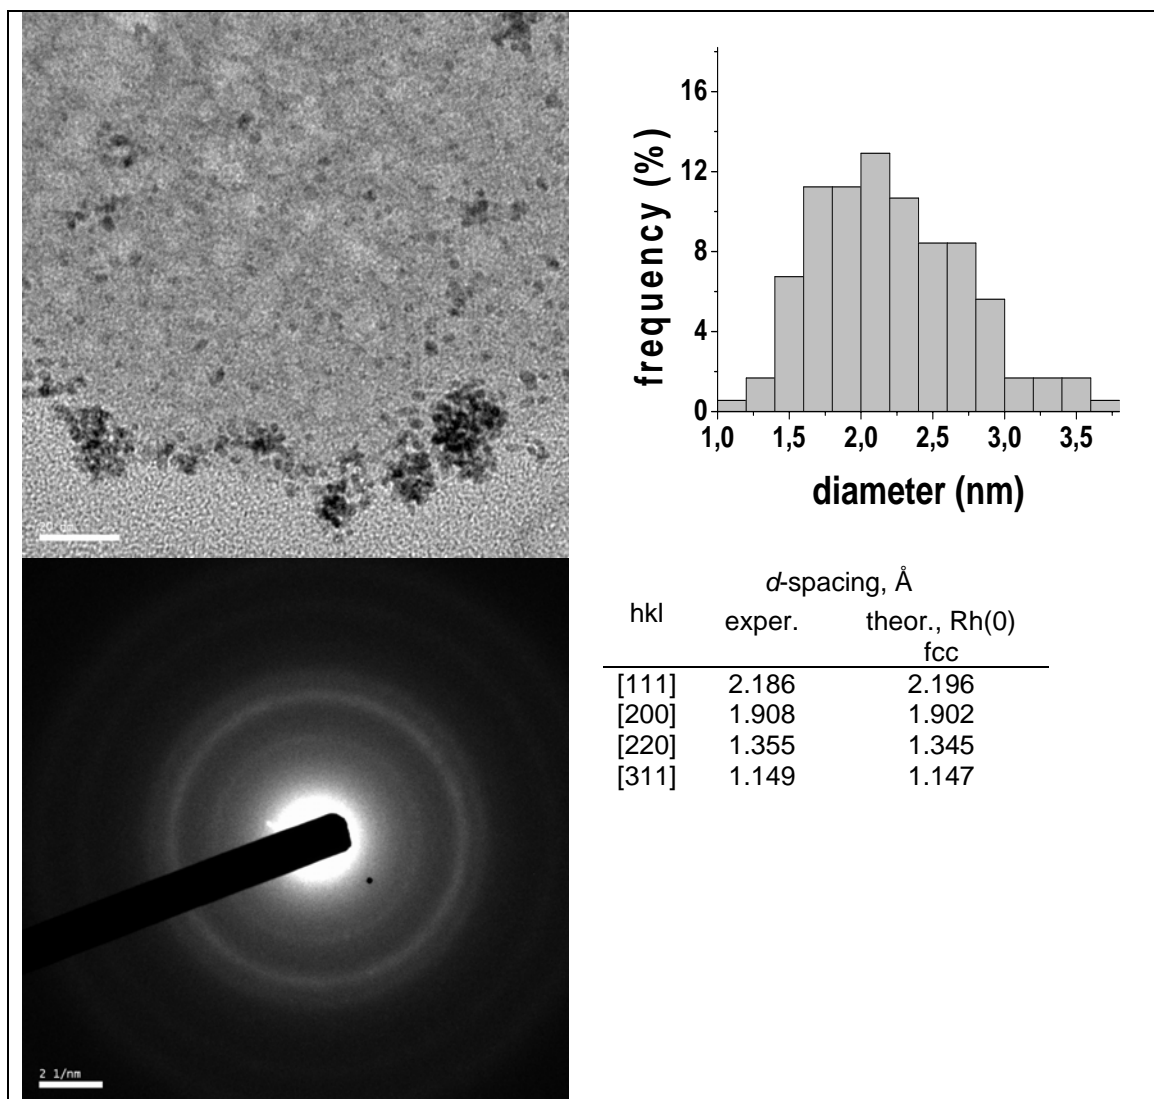

**Table 3, entry 4.** Rh nanoparticles stabilized by compound 4

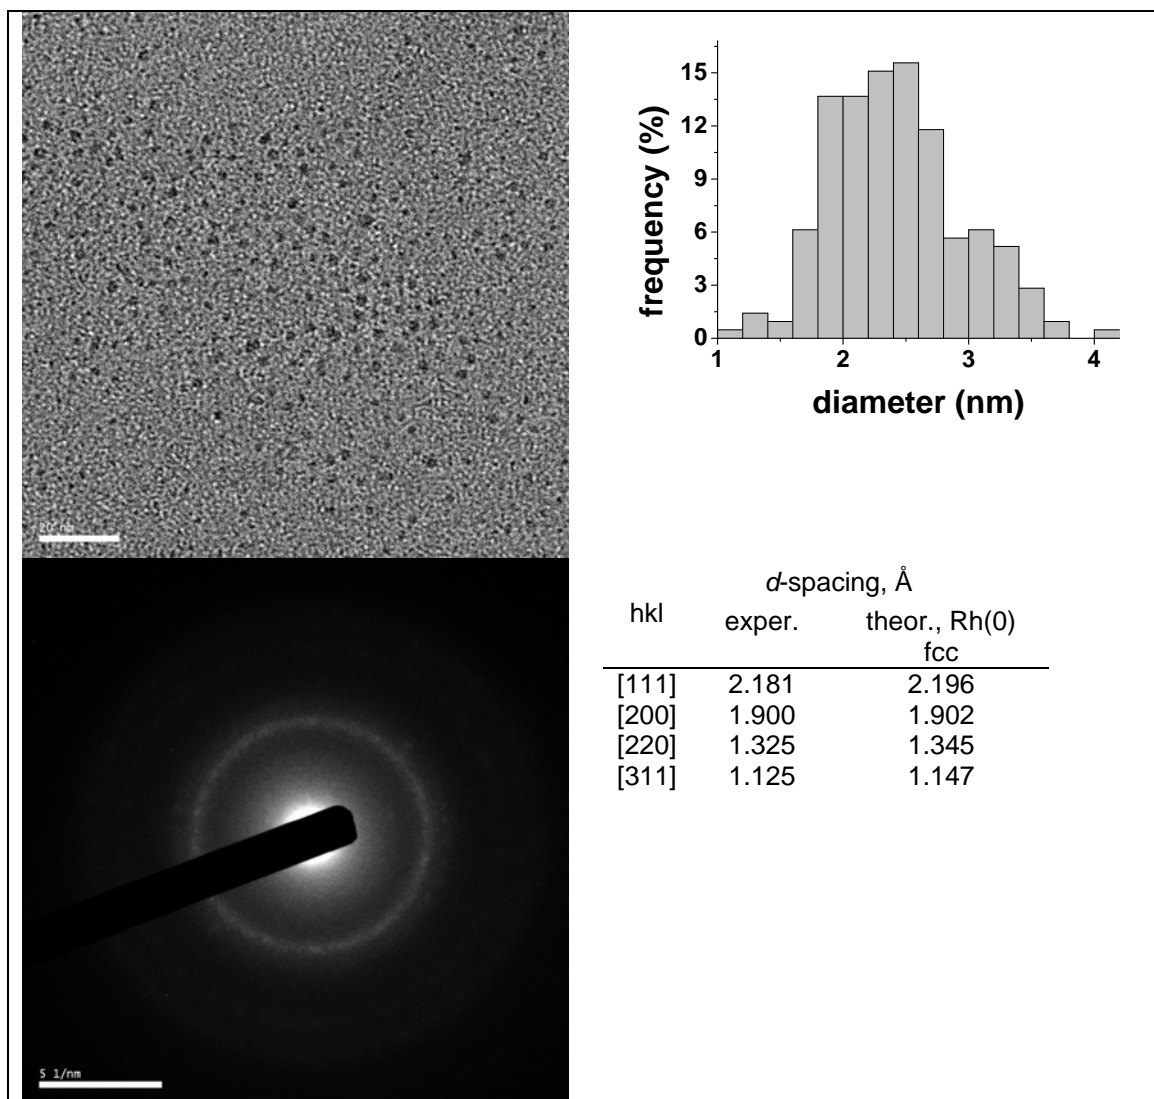

**Table 3, entry 6.** Rh nanoparticles stabilized by compound 6

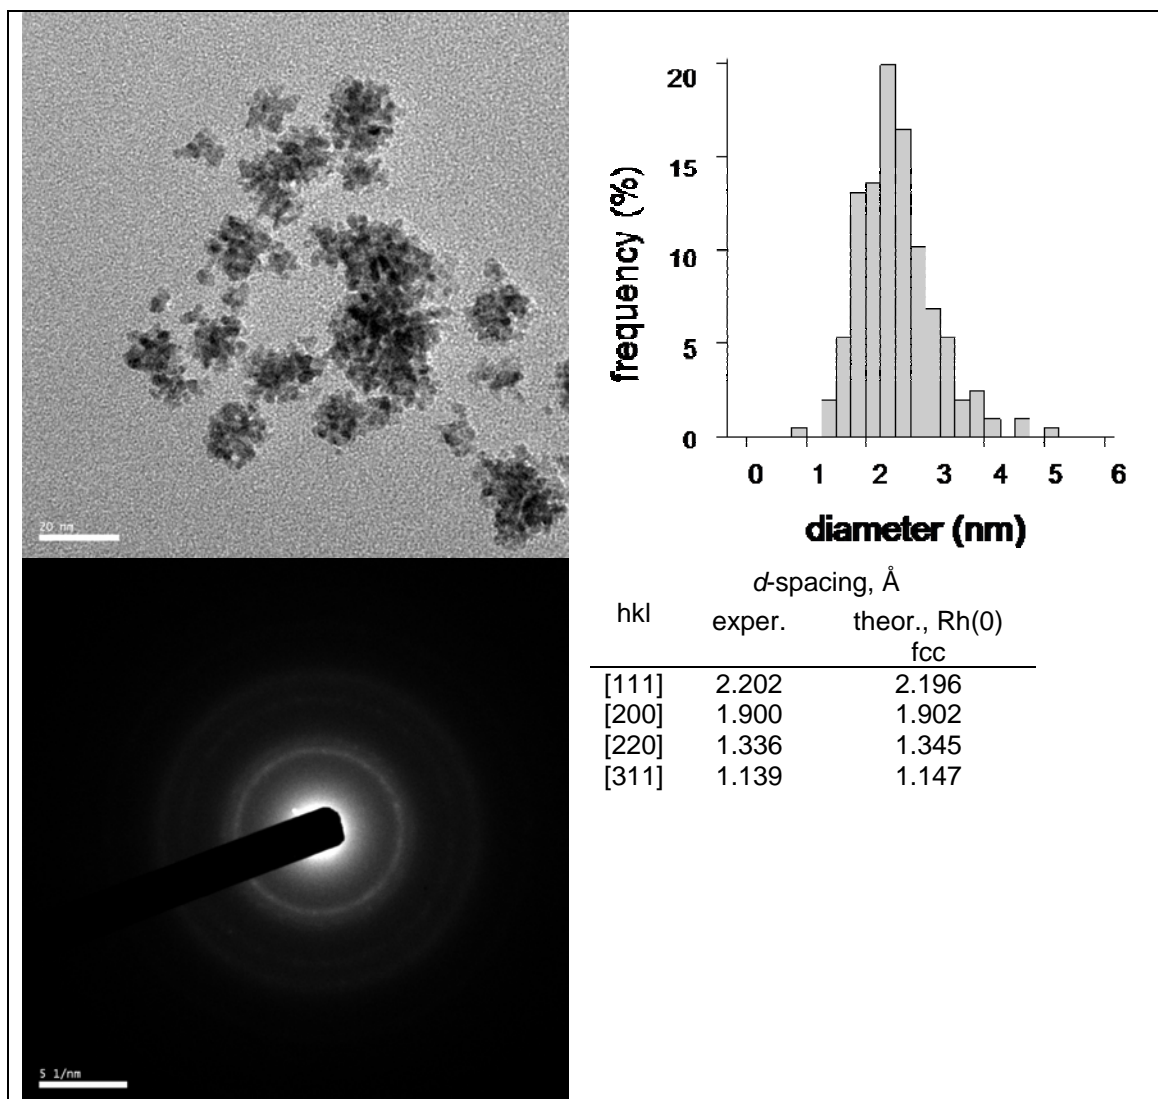

Supplement: b907705g.pdf [file b907705g.pdf]
